# Supplementary material for: Preparation of Salvianolic Acid B Disodium Salt Considering the Water Extract Quality Standard
Source: PubMed Central journal article supplement (PMC6479940; doi:10.3390/molecules24071269), 2019-04-01
Supplement: molecules-24-01269-s001.pdf [file molecules-24-01269-s001.pdf]

**Table S1.** Partial regression coefficients, importance factors, and coefficient confidence intervals

| Factor         | Y <sub>1</sub> |            |             | Y <sub>2</sub> |            |             | IF <sub>j</sub> Value |
|----------------|----------------|------------|-------------|----------------|------------|-------------|-----------------------|
|                | Coefficient    | 95% CI Low | 95% CI High | Coefficient    | 95% CI Low | 95% CI High |                       |
| X <sub>1</sub> | 0.180          | -0.140     | 0.500       | -0.510         | -1.180     | 0.160       | 0.345                 |
| X <sub>2</sub> | -0.840         | -1.150     | -0.520      | -0.490         | -1.160     | 0.180       | 0.665                 |
| X <sub>3</sub> | 0.480          | 0.160      | 0.790       | 0.110          | -0.560     | 0.790       | 0.295                 |
| X <sub>4</sub> | 0.210          | -0.110     | 0.520       | 0.034          | -0.640     | 0.710       | 0.122                 |
| X <sub>5</sub> | 0.099          | -0.220     | 0.410       | -0.055         | -0.730     | 0.620       | 0.077                 |
| X <sub>6</sub> | 0.150          | -0.170     | 0.460       | 0.270          | -0.400     | 0.940       | 0.210                 |
| X <sub>7</sub> | -0.075         | -0.390     | 0.240       | -0.120         | -0.790     | 0.550       | 0.098                 |

X<sub>1</sub>: extraction temperature; X<sub>2</sub>: extraction pH; X<sub>3</sub>: back extraction pH; X<sub>4</sub>: extraction time; X<sub>5</sub>: water consumption for extraction; X<sub>6</sub>: 1-butanol amount; X<sub>7</sub>: water consumption for washing; Y<sub>1</sub>: SAB yield in crude SAB solution; Y<sub>2</sub>: SAB purity in crude SAB solution; IF: importance factor; j: a process parameter. CI: confidence interval.

**Table S2.** Estimated parameter values, determination coefficients, ANOVA results, and coefficient confidence intervals of quadratic models

| Term                          | Y <sub>1</sub> |            |             |          | Y <sub>2</sub> |            |             |         |
|-------------------------------|----------------|------------|-------------|----------|----------------|------------|-------------|---------|
|                               | Coefficient    | 95% CI Low | 95% CI High | p value  | Coefficient    | 95% CI Low | 95% CI High | p value |
| Constant                      | 5.59           | 5.19       | 5.99        | -        | 58.11          | 55.56      | 60.65       | -       |
| X <sub>1</sub>                | 0.78           | 0.50       | 1.06        | 0.0005   | -3.71          | -5.79      | -1.63       | 0.0024  |
| X <sub>2</sub>                | -3.02          | -3.30      | -2.74       | < 0.0001 | -              | -          | -           | -       |
| X <sub>3</sub>                | 2.35           | 2.07       | 2.63        | < 0.0001 | -              | -          | -           | -       |
| X <sub>1</sub> X <sub>2</sub> | -0.67          | -1.07      | -0.27       | 0.0063   | -              | -          | -           | -       |
| X <sub>1</sub> X <sub>3</sub> | 0.51           | 0.11       | 0.91        | 0.0209   | -              | -          | -           | -       |
| X <sub>2</sub> X <sub>3</sub> | -1.73          | -2.13      | -1.34       | < 0.0001 | -3.19          | -6.13      | -0.25       | 0.0357  |
| X <sub>1</sub> <sup>2</sup>   | -0.84          | -1.24      | -0.44       | 0.0021   | -              | -          | -           | -       |
| X <sub>2</sub> <sup>2</sup>   | -1.06          | -1.46      | -0.67       | 0.0006   | -7.22          | -10.16     | -4.28       | 0.0002  |
| X <sub>3</sub> <sup>2</sup>   | -0.88          | -1.28      | -0.49       | 0.0016   | -4.69          | -7.63      | -1.75       | 0.0049  |
| R <sup>2</sup>                | 0.9957         |            |             |          | 0.8509         |            |             |         |
| p value                       | < 0.0001       |            |             |          | 0.0002         |            |             |         |

**Table S3.** Physical properties of the test macroporous resins

| Trade name             | Type               | Particle diameter (mm) | Moisture content (%) |
|------------------------|--------------------|------------------------|----------------------|
| Polyamide (30-60 mesh) | /                  | 0.595-0.250            | 51.36                |
| HPD100 [1]             | Non-polar          | 0.30-1.25              | 66.19                |
| AB-8 [1]               | Weak-polar         | 0.30-1.25              | 62.44                |
| FPA 98Cl               | Strong base anion  | 0.63-0.85              | 69.27                |
| FPA 90Cl               | Strong base anion  | 0.65-0.82              | 61.24                |
| FPA 53                 | Weak base anion    | 0.50-0.75              | 60.37                |
| 50W×2 (200-400 mesh)   | Strong acid cation | 0.035-0.075            | 67.08                |
| 50W×4 (200-400 mesh)   | Strong acid cation | 0.035-0.075            | 67.20                |
| CG161M                 | Non-polar          | 0.075                  | 70.44                |
| XAD 1600N              | Non-polar          | 0.35-0.45              | 71.04                |

1. Jia, G.T.; Lv, X.Y.; Enrichment and purification of madecassoside and asiaticoside from

*Centella asiatica* extracts with macroporous resins. *J. Chromatogr. A* 2008, 1193, 136-141.

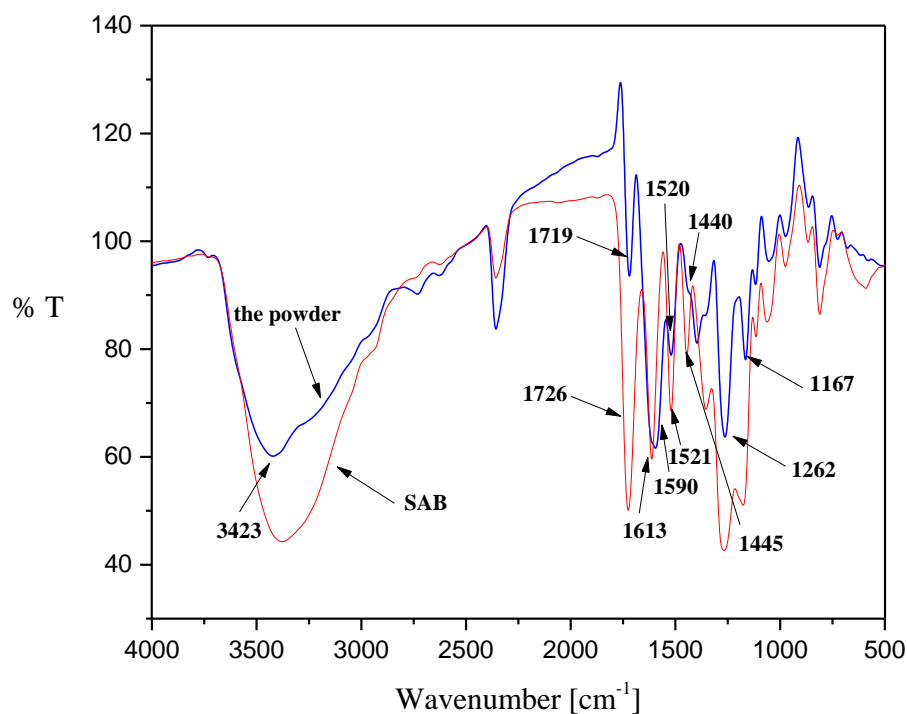

**Figure S1.** FTIR spectrum of the SAB disodium salt and SAB

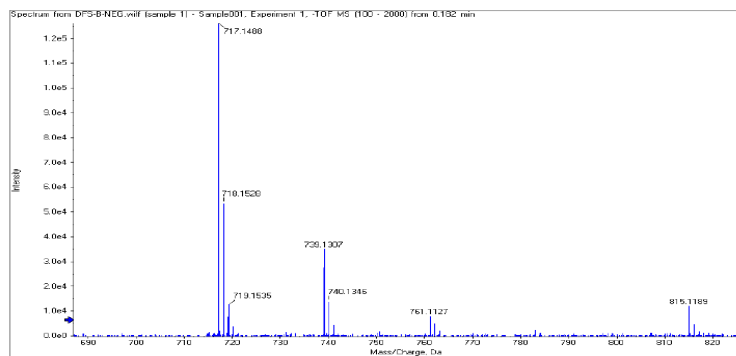

**Figure S2.** TOF-MS spectrum of the SAB disodium salt
